# Supplementary material
Source: Springer Nature journal article supplement (https://mijn.bsl.nl/resource/supplementary/13047_2008_9_MOESM1_ESM.pdf/7108876)

**Figure 1.** The percentage of participants in each group, who perceived the monofilaments at all sites, at each weight.

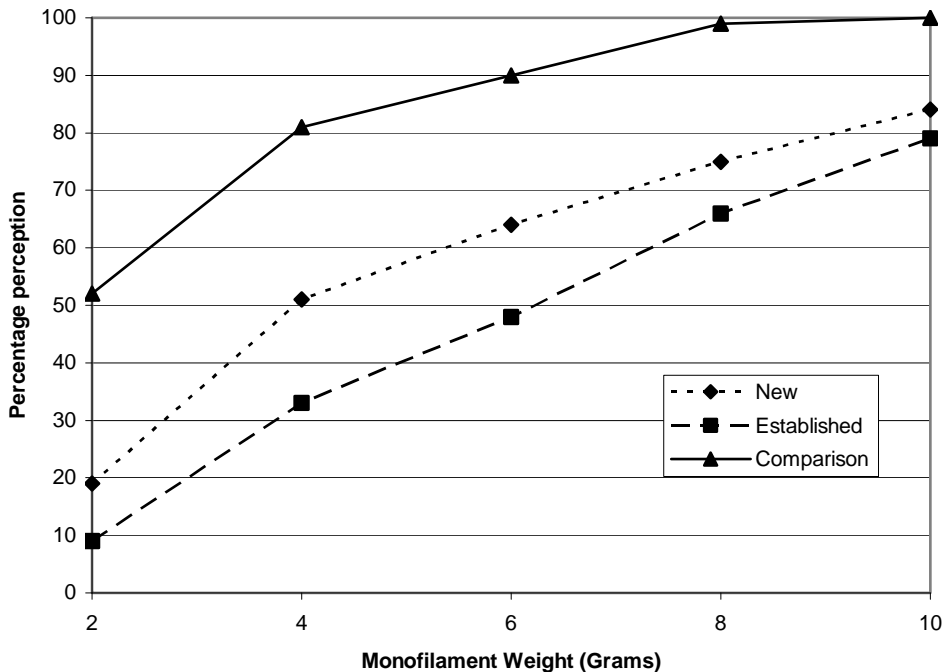

Supplement: MOESM1 [file 7108876]
